# Supplementary material for: Identification of Genes That Promote or Inhibit Olfactory Memory Formation in Drosophila
Source: Oxford University Press journal article supplement (doi:10.1534/genetics.114.173575), 2015-02-02
Supplement: genetics.114.173575-2.pdf [file genetics.114.173575-2.pdf]

**Table S2 Outliers from the secondary screen with a reduced PI.** The Performance Index (PI) was calculated as the number of flies avoiding the CS+ minus those avoiding the CS- over the total in both T-maze arms  $[(CS-)-(CS+)] / [(CS-)+(CS+)]$ . The primary screen was performed with 3 or 4n; the secondary screen at a later date with 4n. Physical abnormalities, such as misshapen wings or lethargic behavior, are noted by (+). Mean Activity Difference for the two-minute window simulating the decision period during testing was calculated from the Trikinetics Monitoring System (Mean Activity Score 60100)-(Mean Activity Score Experimental Line). The Mean Activity Score for the 60100 control line was 44.43 +/- 0.42 (n=552). Differences in activity (Act. Sig.) were determined using ANOVA followed by Dunnett's Post-Hoc test. \* $P < 0.05$ , \*\* $P < 0.01$ , \*\*\* $P < 0.001$ . NT indicates the line was not tested.

| TRANSFORMANT ID | CG NUMBER | DROSOPHILA GENE              | PRIMARY PI & SEM LINE | SECONDARY PI & SEM LINE | PHYSICAL ABNORM. | MEAN ACTIVITY DIFF. | ACT. SIG. |
|-----------------|-----------|------------------------------|-----------------------|-------------------------|------------------|---------------------|-----------|
| 11471           | CG33517   | Dopamine 2-like receptor     | 0.16 ± 0.09           | 0.13 ± 0.10             | -                | -5.63               |           |
| 11817           | CG42260   | CG42260                      | 0.05 ± 0.16           | 0.15 ± 0.13             | +                | NT                  |           |
| 13140           | CG31546   | CG31546                      | 0.21 ± 0.15           | 0.15 ± 0.04             | -                | NT                  |           |
| 19124           | CG2204    | G protein $\alpha$ 47A       | -0.12 ± 0.08          | 0.15 ± 0.06             | +                | NT                  |           |
| 26876           | CG7485    | Octopamine-Tyramine receptor | 0.25 ± 0.07           | 0.19 ± 0.14             | -                | NT                  |           |
| 37549           | CG6711    | TBP-associated factor 2      | 0.15 ± 0.05           | 0.24 ± 0.14             | -                | NT                  |           |
| 46757           | CG3977    | Copper transporter 1A        | 0.23 ± 0.04           | 0.18 ± 0.03             | -                | 11.51               | ***       |
| 48984           | CG8451    | CG8451                       | 0.10 ± 0.17           | 0.22 ± 0.10             | -                | NT                  |           |
| 100010          | CG7595    | crinkled                     | 0.10 ± 0.12           | 0.03 ± 0.05             | -                | 25.68               | ***       |
| 100029          | CG15390   | CG15390                      | 0.17 ± 0.05           | 0.17 ± 0.05             | -                | 22.06               | ***       |
| 100032          | CG14925   | Osiris 21                    | 0.24 ± 0.02           | 0.14 ± 0.10             | +                | 33.73               | ***       |
| 100039          | CG17348   | derailed                     | 0.00 ± 0.05           | 0.07 ± 0.03             | +                | 22.93               | ***       |
| 100067          | CG7354    | mitochondrial                | 0.01 ± 0.04           | 0.13 ± 0.05             | -                | 20.37               | ***       |

| ribosomal protein   |         |                    |             |             |   |       |     |
|---------------------|---------|--------------------|-------------|-------------|---|-------|-----|
| S26                 |         |                    |             |             |   |       |     |
| 100084              | CG4790  | female sterile (1) | 0.14 ± 0.10 | 0.25 ± 0.05 | - | NT    |     |
| M3                  |         |                    |             |             |   |       |     |
| 100122              | CG31256 | Brf                | 0.07 ± 0.04 | 0.04 ± 0.05 | + | NT    |     |
| 100123              | CG31811 | centaurin gamma    | 0.17 ± 0.05 | 0.19 ± 0.08 | - | 12.78 |     |
| 1A                  |         |                    |             |             |   |       |     |
| 100170              | CG9674  | CG9674             | 0.10 ± 0.08 | 0.24 ± 0.08 | + | NT    |     |
| 100189              | CG4058  | Neprilysin 4       | 0.06 ± 0.08 | 0.28 ± 0.05 | + | 12.96 |     |
| 100196              | CG14491 | CG14491            | 0.16 ± 0.05 | 0.24 ± 0.06 | - | 5.46  |     |
| 100213              | CG18262 | CG18262            | 0.15 ± 0.11 | 0.06 ± 0.09 | + | 13.80 | *** |
| 100226              | CG10203 | CG10203            | 0.12 ± 0.12 | 0.18 ± 0.14 | - | NT    |     |
| 100276              | CG1939  | Dephospho-CoA      | 0.13 ± 0.03 | 0.21 ± 0.04 | + | 28.65 | *** |
| kinase              |         |                    |             |             |   |       |     |
| 100295              | CG9779  | Charged            | 0.16 ± 0.16 | 0.15 ± 0.10 | + | NT    |     |
| multivesicular body |         |                    |             |             |   |       |     |
| protein 3           |         |                    |             |             |   |       |     |
| 100400              | CG10804 | CG10804            | 0.09 ± 0.07 | 0.15 ± 0.07 | - | 20.93 | *** |
| 100404              | CG2969  | ABC transporter    | 0.19 ± 0.07 | 0.30 ± 0.07 | - | 12.34 |     |
| expressed in        |         |                    |             |             |   |       |     |
| trachea             |         |                    |             |             |   |       |     |
| 100432              | CG4922  | spalt-adjacent     | 0.18 ± 0.03 | 0.11 ± 0.05 | - | 6.03  |     |
| 100438              | CG15529 | CG15529            | 0.18 ± 0.06 | 0.13 ± 0.04 | + | 13.90 | *   |
| 100439              | CG13602 | CG43999            | 0.25 ± 0.09 | 0.22 ± 0.04 | + | NT    |     |
| 100458              | CG15585 | Osiris 1           | 0.09 ± 0.07 | 0.17 ± 0.08 | - | 20.40 | *** |
| 100466              | CG5611  | CG5611             | 0.25 ± 0.02 | 0.20 ± 0.04 | - | 20.18 | *** |
| 100494              | CG7135  | CG7135             | 0.24 ± 0.05 | 0.31 ± 0.02 | - | 3.62  |     |
| 100539              | CG18467 | CG18467            | 0.27 ± 0.05 | 0.26 ± 0.05 | - | 1.84  |     |

|        |         |                                            |              |             |   |        |     |
|--------|---------|--------------------------------------------|--------------|-------------|---|--------|-----|
| 100588 | CG6251  | Nucleoporin 62                             | 0.03 ± 0.09  | 0.18 ± 0.07 | - | -16.41 | *** |
| 100593 | CG9238  | CG9238                                     | 0.10 ± 0.07  | 0.03 ± 0.03 | - | 4.40   |     |
| 100598 | CG3578  | bifid                                      | 0.21 ± 0.08  | 0.12 ± 0.02 | + | NT     |     |
| 100618 | CG8372  | CG8372                                     | 0.14 ± 0.07  | 0.16 ± 0.01 | - | 20.18  | *** |
| 100652 | CG32017 | CG32017                                    | 0.18 ± 0.05  | 0.13 ± 0.04 | - | -2.76  |     |
| 100691 | CG9949  | seven in absentia                          | 0.25 ± 0.03  | 0.25 ± 0.02 | - | 14.65  | **  |
| 100710 | CG14407 | CG14407                                    | 0.25 ± 0.01  | 0.24 ± 0.03 | - | 1.21   |     |
| 100719 | CG8295  | Myelodysplasia/mye<br>loid leukemia factor | 0.19 ± 0.05  | 0.16 ± 0.05 | - | 10.59  |     |
| 100723 | CG4211  | no on or off<br>transient A                | 0.13 ± 0.09  | 0.19 ± 0.07 | - | 17.89  | *** |
| 100729 | CG7967  | CG7967                                     | 0.25 ± 0.05  | 0.12 ± 0.06 | - | 0.90   |     |
| 100735 | CG10897 | toutatis                                   | 0.06 ± 0.09  | 0.22 ± 0.04 | - | NT     |     |
| 100737 | CG3351  | mitochondrial<br>ribosomal protein<br>L11  | 0.07 ± 0.06  | 0.05 ± 0.04 | - | 12.59  |     |
| 100745 | CG32675 | Transport and Golgi<br>organization 5      | 0.16 ± 0.07  | 0.25 ± 0.06 | - | NT     |     |
| 100846 | CG42543 | multiplexin                                | 0.25 ± 0.1   | 0.26 ± 0.10 | - | NT     |     |
| 100851 | CG6765  | CG6765                                     | 0.13 ± 0.07  | 0.21 ± 0.05 | - | 11.71  |     |
| 100927 | CG8795  | CG8795                                     | 0.2 ± 0.14   | 0.29 ± 0.06 | - | 1.84   |     |
| 100947 | CG13933 | CG13933                                    | -0.19 ± 0.03 | 0.14 ± 0.02 | - | 34.29  | *** |
| 100964 | CG32834 | CG32834                                    | 0.19 ± 0.09  | 0.22 ± 0.10 | - | NT     |     |
| 100969 | CG13459 | cp309                                      | 0.07 ± 0.06  | 0.05 ± 0.06 | - | NT     |     |
| 100998 | CG1504  | CG1504                                     | 0.22 ± 0.06  | 0.23 ± 0.08 | - | NT     |     |
| 101016 | CG6976  | Myosin 28B1                                | 0.20 ± 0.03  | 0.16 ± 0.07 | + | NT     |     |
| 101047 | CG32016 | CG32016                                    | 0.14 ± 0.09  | 0.12 ± 0.08 | - | 20.15  | *** |
| 101100 | CG3234  | timeless                                   | 0.26 ± 0.06  | 0.30 ± 0.07 | - | 6.56   |     |

|        |         |                     |              |              |   |       |     |
|--------|---------|---------------------|--------------|--------------|---|-------|-----|
| 101125 | CG9559  | folded gastrulation | 0.25 ± 0.10  | 0.19 ± 0.03  | - | 24.28 | *** |
| 101156 | CG31740 | CG31740             | 0.22 ± 0.16  | 0.19 ± 0.06  | + | NT    |     |
| 101161 | CG14617 | CG14617             | 0.15 ± 0.02  | 0.13 ± 0.08  | - | NT    |     |
| 101166 | CG12283 | kekkon-1            | 0.16 ± 0.05  | 0.11 ± 0.05  | - | 19.56 | *** |
| 101315 | CG7636  | mitochondrial       | 0.12 ± 0.04  | 0.00 ± 0.08  | + | NT    |     |
|        |         | ribosomal protein   |              |              |   |       |     |
|        |         | L2                  |              |              |   |       |     |
| 101324 | CG42251 | CG42251             | 0.17 ± 0.06  | 0.17 ± 0.04  | - | 25.31 | *** |
| 101327 | CG12223 | Dorsal switch       | 0.23 ± 0.06  | 0.13 ± 0.05  | + | 29.58 | *** |
|        |         | protein 1           |              |              |   |       |     |
| 101347 | CG31140 | CG31140             | 0.04 ± 0.04  | 0.14 ± 0.06  | - | 32.09 | *** |
| 101351 | CG5818  | mitochondrial       | 0.02 ± 0.06  | -0.01 ± 0.04 | - | 31.68 | *** |
|        |         | ribosomal protein   |              |              |   |       |     |
|        |         | L4                  |              |              |   |       |     |
| 101352 | CG5048  | CG5048              | 0.19 ± 0.02  | 0.22 ± 0.04  | - | 10.83 |     |
| 101372 | CG42540 | CG42540             | 0.24 ± 0.07  | 0.21 ± 0.02  | + | NT    |     |
| 101402 | CG43388 | Hyperkinetic        | 0.19 ± 0.06  | 0.22 ± 0.06  | + | NT    |     |
| 101423 | CG14048 | mitochondrial       | -0.03 ± 0.06 | 0.05 ± 0.02  | - | 30.46 | *** |
|        |         | ribosomal protein   |              |              |   |       |     |
|        |         | L14                 |              |              |   |       |     |
| 101434 | CG12809 | nervous fingers 2   | 0.20 ± 0.08  | 0.27 ± 0.06  | - | 14.81 | **  |
| 101443 | CG14413 | mitochondrial       | 0.03 ± 0.02  | 0.11 ± 0.06  | - | 22.78 | *** |
|        |         | ribosomal protein   |              |              |   |       |     |
|        |         | S25                 |              |              |   |       |     |
| 101449 | CG1417  | sluggish A          | 0.19 ± 0.06  | 0.25 ± 0.08  | - | 14.65 | **  |
| 101459 | CG8110  | sunday driver       | 0.24 ± 0.02  | 0.21 ± 0.06  | + | NT    |     |
| 101477 | CG17228 | prospero            | 0.15 ± 0.07  | 0.10 ± 0.06  | - | NT    |     |
| 101503 | CG32264 | CG32264             | 0.13 ± 0.04  | 0.10 ± 0.08  | - | NT    |     |

|        |         |                                           |              |              |   |       |     |
|--------|---------|-------------------------------------------|--------------|--------------|---|-------|-----|
| 101521 | CG7238  | septin interacting<br>protein 1           | 0.11 ± 0.03  | 0.17 ± 0.06  | - | 20.84 | *** |
| 101540 | CG7499  | Rh50                                      | 0.02 ± 0.11  | 0.18 ± 0.10  | - | NT    |     |
| 101547 | CG10574 | Inhibitor-2                               | 0.18 ± 0.11  | 0.09 ± 0.06  | + | NT    |     |
| 101549 | CG13608 | mitochondrial<br>ribosomal protein<br>S24 | 0.07 ± 0.05  | 0.05 ± 0.07  | + | NT    |     |
| 101586 | CG32373 | CG32373                                   | 0.06 ± 0.08  | 0.10 ± 0.03  | + | NT    |     |
| 101628 | CG15883 | Odorant-binding<br>protein 18a            | 0.20 ± 0.08  | 0.09 ± 0.16  | - | 11.90 |     |
| 101670 | CG4049  | CG4049                                    | 0.24 ± 0.03  | 0.12 ± 0.04  | - | 17.25 | *** |
| 101713 | CGnone  | N/A                                       | 0.15 ± 0.02  | 0.25 ± 0.05  | + | 35.78 | *** |
| 101744 | CG5065  | CG5065                                    | 0.12 ± 0.08  | 0.02 ± 0.08  | + | NT    |     |
| 101758 | CG1098  | MLF1-adaptor<br>molecule                  | 0.12 ± 0.13  | 0.18 ± 0.07  | - | 14.87 | **  |
| 101759 | CG9533  | rutabaga                                  | -0.04 ± 0.05 | 0.09 ± 0.03  | - | 6.81  |     |
| 101763 | CG15862 | cAMP-dependent<br>protein kinase R2       | 0.23 ± 0.03  | 0.17 ± 0.04  | + | NT    |     |
| 101768 | CG5226  | CG5226                                    | 0.18 ± 0.06  | 0.25 ± 0.04  | - | 26.93 | *** |
| 101779 | CG6588  | Fasciclin 1                               | 0.11 ± 0.07  | 0.17 ± 0.05  | + | 12.31 |     |
| 101811 | CG15720 | radish                                    | 0.02 ± 0.10  | 0.09 ± 0.04  | + | 12.34 | *** |
| 101842 | CG33960 | Semaphorin-2b                             | 0.16 ± 0.07  | -0.04 ± 0.08 | - | 5.59  |     |
| 101845 | CG8985  | Dromyosuppressin<br>receptor 1            | 0.04 ± 0.05  | 0.07 ± 0.05  | - | 26.42 | *** |
| 101874 | CG8279  | Phosphodiesterase<br>6                    | 0.04 ± 0.14  | 0.24 ± 0.09  | + | 16.40 | *** |
| 101885 | CG8066  | CG8066                                    | 0.19 ± 0.08  | 0.23 ± 0.04  | + | NT    |     |
| 101953 | CG12071 | CG12071                                   | 0.17 ± 0.06  | 0.20 ± 0.11  | - | NT    |     |

|        |         |                     |              |              |   |       |     |
|--------|---------|---------------------|--------------|--------------|---|-------|-----|
| 101994 | CG5869  | CG5869              | 0.16 ± 0.06  | 0.21 ± 0.02  | + | NT    |     |
| 102024 | CG13318 | CG13318             | 0.21 ± 0.01  | 0.16 ± 0.07  | - | 31.50 | *** |
| 102041 | CG7649  | Meltrin             | 0.07 ± 0.05  | 0.13 ± 0.06  | - | 25.09 | *** |
| 102047 | CG1079  | Fire exit           | 0.02 ± 0.06  | 0.21 ± 0.07  | - | 9.25  |     |
| 102073 | CG17716 | faint sausage       | 0.10 ± 0.12  | 0.15 ± 0.04  | + | 18.40 | *** |
| 102078 | CG9866  | CG9866              | 0.15 ± 0.06  | 0.20 ± 0.11  | - | NT    |     |
| 102101 | CG3218  | female sterile (1)  | 0.00 ± 0.03  | 0.19 ± 0.02  | - | NT    |     |
| K10    |         |                     |              |              |   |       |     |
| 102159 | CG6354  | Ribonuclear protein | 0.19 ± 0.04  | 0.22 ± 0.04  | + | NT    |     |
| at 97D |         |                     |              |              |   |       |     |
| 102169 | CG42683 | CG42683             | 0.20 ± 0.08  | 0.22 ± 0.10  | - | NT    |     |
| 102187 | CG1499  | nyobe               | 0.06 ± 0.03  | 0.21 ± 0.09  | - | 25.96 | *** |
| 102192 | CG3915  | Derailed 2          | 0.18 ± 0.01  | 0.22 ± 0.05  | + | NT    |     |
| 102196 | CG17326 | luna                | -0.03 ± 0.13 | 0.14 ± 0.04  | - | 15.12 | **  |
| 102202 | CG14075 | CG14075             | 0.11 ± 0.05  | 0.28 ± 0.02  | - | 20.84 | *** |
| 102282 | CG11019 | CG11019             | 0.23 ± 0.04  | 0.23 ± 0.04  | + | NT    |     |
| 102293 | CG43374 | Cht6                | 0.17 ± 0.06  | 0.25 ± 0.07  | + | NT    |     |
| 102306 | CG9273  | Replication protein | 0.08 ± 0.06  | 0.17 ± 0.05  | + | 17.45 | *** |
| A2     |         |                     |              |              |   |       |     |
| 102335 | CG9350  | CG9350              | -0.01 ± 0.03 | -0.02 ± 0.10 | + | 35.21 | *** |
| 102362 | CGnone  | CGnone              | 0.12 ± 0.06  | 0.09 ± 0.07  | + | 27.00 | *** |
| 102401 | CG6730  | Cyp4d21             | 0.19 ± 0.08  | 0.20 ± 0.06  | - | NT    |     |
| 102417 | CG42613 | CG42613             | 0.24 ± 0.04  | 0.28 ± 0.06  | - | 27.62 | *** |
| 102443 | CG5955  | CG5955              | 0.17 ± 0.06  | 0.18 ± 0.06  | - | 23.09 | *** |
| 102477 | CG3082  | lethal (2) k09913   | 0.19 ± 0.06  | 0.12 ± 0.06  | + | 31.00 | *** |
| 102481 | CG34384 | CG34384             | 0.17 ± 0.05  | 0.19 ± 0.11  | - | 17.59 | *** |
| 102525 | CG42342 | CG42342             | 0.07 ± 0.05  | 0.18 ± 0.09  | - | 18.15 | *** |
| 102527 | CG14025 | Blastoderm-specific | 0.18 ± 0.10  | 0.14 ± 0.05  | + | 28.56 | *** |

| gene 25D    |         |                               |              |              |   |       |     |
|-------------|---------|-------------------------------|--------------|--------------|---|-------|-----|
| 102566      | CG42687 | CoRest                        | 0.18 ± 0.01  | 0.21 ± 0.10  | - | NT    |     |
| 102597      | CG34354 | CG34354                       | 0.04 ± 0.11  | 0.18 ± 0.04  | + | 22.87 | *** |
| 102639      | CG42555 | tweek                         | -0.09 ± 0.04 | 0.06 ± 0.07  | - | NT    |     |
| 102698      | CG10134 | beat-Va                       | 0.16 ± 0.04  | 0.26 ± 0.07  | + | NT    |     |
| 102707      | CG42253 | Na <sup>+</sup> -driven anion | 0.12 ± 0.05  | 0.22 ± 0.08  | - | 9.09  |     |
| exchanger 1 |         |                               |              |              |   |       |     |
| 102709      | CG13748 | CG13748                       | 0.20 ± 0.09  | 0.12 ± 0.17  | - | 6.78  |     |
| 102755      | CG12641 | CG12641                       | -0.23 ± 0.09 | 0.26 ± 0.03  | + | NT    |     |
| 102771      | CG18641 | CG18641                       | 0.17 ± 0.11  | 0.09 ± 0.07  | - | 11.37 |     |
| 102793      | CG14390 | beat-Vc                       | -0.24 ± 0.08 | 0.05 ± 0.06  | + | 27.15 | *** |
| 102795      | CG31160 | CG31160                       | 0.20 ± 0.03  | 0.16 ± 0.03  | + | 30.09 | *** |
| 102802      | CG9486  | CG9486                        | 0.13 ± 0.05  | 0.19 ± 0.08  | - | 12.15 |     |
| 102808      | CG30197 | CG30197                       | 0.16 ± 0.09  | 0.03 ± 0.09  | + | NT    |     |
| 102823      | CG42613 | CG42613                       | 0.14 ± 0.01  | 0.18 ± 0.13  | - | 11.62 |     |
| 102892      | CG5683  | Adult enhancer                | 0.25 ± 0.02  | 0.23 ± 0.05  | - | NT    |     |
| factor 1    |         |                               |              |              |   |       |     |
| 102916      | CG32039 | CG32039                       | 0.17 ± 0.11  | 0.21 ± 0.05  | - | 15.93 | *** |
| 103031      | CG31997 | CG31997                       | 0.00 ± 0.03  | 0.20 ± 0.03  | + | NT    |     |
| 103140      | CG3436  | CG3436                        | 0.21 ± 0.02  | 0.13 ± 0.07  | + | 16.62 | *** |
| 103142      | CG33181 | CG33181                       | 0.08 ± 0.07  | 0.10 ± 0.06  | + | 26.15 | *** |
| 103146      | CG12752 | NTF2-related export           | 0.02 ± 0.03  | 0.18 ± 0.05  | - | NT    |     |
| protein 1   |         |                               |              |              |   |       |     |
| 103201      | CG6395  | Cysteine string               | 0.17 ± 0.07  | -0.03 ± 0.02 | - | 29.25 | *** |
| protein     |         |                               |              |              |   |       |     |
| 103222      | CG12838 | Tetraspanin 42Eo              | 0.15 ± 0.08  | 0.27 ± 0.10  | - | NT    |     |
| 103267      | CG43375 | CG43375                       | 0.20 ± 0.03  | 0.06 ± 0.08  | + | NT    |     |
| 103296      | CG13664 | Cadherin 96Cb                 | 0.05 ± 0.18  | 0.10 ± 0.05  | - | NT    |     |

|        |         |                                          |              |             |   |       |     |
|--------|---------|------------------------------------------|--------------|-------------|---|-------|-----|
| 103308 | CG17834 | CG17834                                  | 0.12 ± 0.14  | 0.12 ± 0.03 | + | 28.40 | *** |
| 103351 | CG11847 | Caliban                                  | 0.20 ± 0.05  | 0.08 ± 0.01 | - | NT    |     |
| 103363 | CG9262  | Shaker cognate I                         | 0.07 ± 0.08  | 0.17 ± 0.07 | + | NT    |     |
| 103373 | CG2692  | gooseberry-neuro                         | 0.17 ± 0.08  | 0.22 ± 0.05 | + | NT    |     |
| 103378 | CG11926 | CG11926                                  | 0.02 ± 0.16  | 0.01 ± 0.10 | - | NT    |     |
| 103382 | CG31543 | HIF prolyl<br>hydroxylase                | 0.25 ± 0.05  | 0.27 ± 0.07 | - | NT    |     |
| 103389 | CG30429 | CG30429                                  | 0.23 ± 0.17  | 0.22 ± 0.06 | - | 5.78  |     |
| 103407 | CG16993 | inturned                                 | 0.16 ± 0.09  | 0.22 ± 0.05 | + | NT    |     |
| 103410 | CG8789  | wallenda                                 | 0.14 ± 0.04  | 0.19 ± 0.04 | - | NT    |     |
| 103414 | CG9646  | CG9646                                   | 0.14 ± 0.04  | 0.19 ± 0.08 | - | NT    |     |
| 103426 | CG1107  | auxillin                                 | 0.08 ± 0.13  | 0.06 ± 0.12 | + | 26.34 | *** |
| 103449 | CG42252 | mind-meld                                | 0.13 ± 0.02  | 0.23 ± 0.06 | - | 30.15 | *** |
| 103485 | CG8946  | Sphingosine-1-<br>phosphate lyase        | 0.22 ± 0.08  | 0.21 ± 0.07 | + | NT    |     |
| 103508 | CG33936 | CG33936                                  | 0.17 ± 0.04  | 0.12 ± 0.05 | + | 16.87 | *** |
| 103533 | CG34104 | CG34104                                  | 0.08 ± 0.03  | 0.12 ± 0.05 | + | 32.15 | *** |
| 103551 | CG14447 | Glutamate receptor<br>binding protein    | 0.10 ± 0.05  | 0.23 ± 0.08 | + | 31.00 | *** |
| 103557 | CG6177  | IdlCp-related protein                    | 0.22 ± 0.09  | 0.19 ± 0.11 | - | -1.35 |     |
| 103566 | CG15016 | mitochondrial<br>ribosomal protein<br>S6 | -0.02 ± 0.04 | 0.12 ± 0.02 | - | 24.59 | *** |
| 103570 | CG11194 | Hairy/E(spl)-related<br>with YRPW motif  | 0.12 ± 0.06  | 0.28 ± 0.07 | - | 11.25 |     |
| 103597 | CG3497  | Suppressor of<br>Hairless                | 0.19 ± 0.03  | 0.18 ± 0.04 | - | -9.47 |     |
| 103602 | CG10639 | CG10639                                  | 0.25 ± 0.11  | 0.13 ± 0.06 | - | 4.84  |     |



|        |         |                                               |              |              |   |       |     |
|--------|---------|-----------------------------------------------|--------------|--------------|---|-------|-----|
| 103608 | CG11164 | CG11164                                       | 0.26 ± 0.08  | 0.25 ± 0.03  | - | 25.75 | *** |
| 103631 | CG9325  | hu li tai shao                                | 0.32 ± 0.04  | 0.25 ± 0.06  | - | 9.46  |     |
| 103636 | CG5919  | CG5919                                        | 0.09 ± 0.09  | 0.11 ± 0.09  | + | 31.06 | *** |
| 103656 | CG5288  | Galactokinase                                 | 0.07 ± 0.06  | -0.01 ± 0.10 | - | NT    |     |
| 103703 | CG4006  | Akt1                                          | 0.20 ± 0.09  | 0.21 ± 0.04  | + | 10.20 | **  |
| 103720 | CG42341 | cAMP-dependent<br>protein kinase R1           | -0.02 ± 0.05 | 0.15 ± 0.08  | - | 5.25  |     |
| 103722 | CG1789  | CG1789                                        | 0.21 ± 0.00  | 0.11 ± 0.07  | + | NT    |     |
| 103734 | CG11132 | DMAP1                                         | 0.14 ± 0.05  | 0.24 ± 0.03  | - | 16.46 | *** |
| 103756 | CG1487  | kurtz                                         | 0.12 ± 0.08  | 0.12 ± 0.06  | + | 14.06 | *** |
| 103768 | CG9611  | flyers-cup                                    | 0.22 ± 0.11  | 0.24 ± 0.05  | - | 2.65  |     |
| 103782 | CG8849  | mitochondrial<br>ribosomal protein<br>L24     | 0.13 ± 0.06  | -0.02 ± 0.04 | - | 26.81 | *** |
| 103783 | CG11802 | CG11802                                       | 0.22 ± 0.02  | 0.23 ± 0.03  | + | NT    |     |
| 103824 | CG43223 | CG43223                                       | 0.04 ± 0.07  | 0.08 ± 0.05  | + | NT    |     |
| 103830 | CG9088  | little imaginal discs                         | 0.25 ± 0.06  | 0.12 ± 0.06  | + | NT    |     |
| 103831 | CG5629  | Phosphopantotheno<br>ylcysteine<br>synthetase | 0.22 ± 0.05  | 0.20 ± 0.06  | - | 19.68 | *** |
| 103832 | CG18005 | beag                                          | 0.16 ± 0.05  | 0.13 ± 0.05  | + | NT    |     |
| 103844 | CG34387 | futsch                                        | 0.07 ± 0.08  | 0.04 ± 0.03  | + | 23.84 | *** |
| 103916 | CG32549 | CG32549                                       | 0.17 ± 0.02  | 0.10 ± 0.11  | + | NT    |     |
| 103931 | CG11516 | Protein tyrosine<br>phosphatase 99A           | 0.14 ± 0.07  | -0.04 ± 0.24 | - | 20.96 | *** |
| 103950 | CG4743  | CG4743                                        | 0.09 ± 0.09  | 0.18 ± 0.04  | + | NT    |     |
| 103958 | CG17330 | juvenile hormone<br>acid                      | 0.08 ± 0.07  | 0.18 ± 0.07  | + | NT    |     |

| methyltransferase     |         |                          |              |              |   |       |     |
|-----------------------|---------|--------------------------|--------------|--------------|---|-------|-----|
| 103971                | CG15465 | CG15465                  | 0.23 ± 0.04  | 0.22 ± 0.03  | + | NT    |     |
| 103973                | CG5811  | Neuropeptide Y           | 0.07 ± 0.08  | 0.17 ± 0.04  | + | 25.03 | *** |
| receptor-like         |         |                          |              |              |   |       |     |
| 104011                | CG5412  | CG5412                   | 0.11 ± 0.05  | 0.15 ± 0.12  | + | 33.21 | *** |
| 104022                | CG11876 | CG11876                  | 0.10 ± 0.09  | 0.09 ± 0.03  | - | NT    |     |
| 104072                | CG33528 | Vesicular                | -0.01 ± 0.11 | 0.06 ± 0.11  | + | 16.90 | *** |
| monoamine transporter |         |                          |              |              |   |       |     |
| 104082                | CG32647 | CG32647                  | 0.22 ± 0.08  | 0.09 ± 0.08  | + | 21.29 | *** |
| 104143                | CG12278 | CG12278                  | 0.16 ± 0.06  | 0.09 ± 0.05  | - | NT    |     |
| 104159                | CG43140 | polychaetoid             | 0.19 ± 0.14  | 0.08 ± 0.04  | + | NT    |     |
| 104166                | CG6850  | UDP-glucose-glycoprotein | 0.23 ± 0.06  | 0.23 ± 0.04  | - | NT    |     |
| glucosyltransferase   |         |                          |              |              |   |       |     |
| 104244                | CG14074 | CG14074                  | 0.06 ± 0.10  | 0.28 ± 0.04  | + | NT    |     |
| 104252                | CG6236  | CG6236                   | 0.18 ± 0.05  | 0.24 ± 0.10  | - | 14.00 | **  |
| 104256                | CG33145 | CG33145                  | 0.14 ± 0.10  | 0.11 ± 0.07  | - | 1.78  |     |
| 104275                | CG18766 | CG18766                  | 0.07 ± 0.05  | 0.16 ± 0.04  | + | NT    |     |
| 104278                | CG9394  | CG9394                   | 0.21 ± 0.07  | 0.20 ± 0.06  | + | 13.93 | *** |
| 104288                | CG12758 | serrano                  | 0.20 ± 0.04  | 0.11 ± 0.08  | + | 22.21 | *** |
| 104305                | CG1124  | CG1124                   | 0.05 ± 0.02  | 0.06 ± 0.10  | - | NT    |     |
| 104389                | CG42234 | Dbx                      | 0.17 ± 0.04  | 0.07 ± 0.10  | - | 17.21 | *** |
| 104401                | CG10327 | TAR DNA-binding          | 0.06 ± 0.04  | 0.03 ± 0.02  | + | NT    |     |
| protein-43 homolog    |         |                          |              |              |   |       |     |
| 104402                | CG9650  | CG9650                   | -0.01 ± 0.10 | 0.23 ± 0.05  | - | 13.06 | *** |
| 104411                | CG6657  | vegetable                | 0.12 ± 0.07  | -0.05 ± 0.02 | + | 23.15 | *** |
| 104422                | CG42344 | bruchpilot               | 0.03 ± 0.07  | 0.04 ± 0.05  | + | 34.46 | *** |

|        |         |                                     |             |             |   |       |     |
|--------|---------|-------------------------------------|-------------|-------------|---|-------|-----|
| 104443 | CG11722 | CG11722                             | 0.17 ± 0.04 | 0.07 ± 0.05 | + | 21.18 | *** |
| 104483 | CG16740 | Rhodopsin 2                         | 0.17 ± 0.07 | 0.22 ± 0.07 | - | 11.71 |     |
| 104486 | CG6167  | PICK1                               | 0.19 ± 0.03 | 0.19 ± 0.04 | - | 30.40 | *** |
| 104498 | CG17912 | CG17912                             | 0.13 ± 0.05 | 0.12 ± 0.05 | - | NT    |     |
| 104502 | CG8280  | Elongation factor<br>1 $\alpha$ 48D | 0.10 ± 0.05 | 0.16 ± 0.10 | - | NT    |     |
| 104549 | CG8401  | CG8401                              | 0.11 ± 0.07 | 0.19 ± 0.08 | + | 28.31 | *** |
| 104554 | CG34342 | CG34342                             | 0.22 ± 0.06 | 0.20 ± 0.09 | + | 36.03 | *** |
| 104560 | CG15760 | CG15760                             | 0.22 ± 0.23 | 0.10 ± 0.09 | - | 27.15 | *** |
| 104563 | CG5954  | lethal (3) malignant<br>brain tumor | 0.07 ± 0.11 | 0.21 ± 0.04 | + | NT    |     |
| 104582 | CG4807  | abrupt                              | 0.18 ± 0.00 | 0.22 ± 0.04 | - | 10.31 | **  |
| 104594 | CG32390 | cornetto                            | 0.25 ± 0.13 | 0.28 ± 0.08 | + | NT    |     |
| 104656 | CG1812  | CG1812                              | 0.03 ± 0.08 | 0.10 ± 0.12 | + | NT    |     |
| 104665 | CG4620  | unkempt                             | 0.19 ± 0.08 | 0.15 ± 0.06 | + | NT    |     |
| 104671 | CG4698  | Wnt oncogene<br>analog 4            | 0.03 ± 0.07 | 0.22 ± 0.12 | + | 11.49 | *** |
| 104674 | CG2092  | scraps                              | 0.15 ± 0.10 | 0.13 ± 0.05 | + | 24.87 | *** |
| 104681 | CG5529  | BarH1                               | 0.13 ± 0.12 | 0.18 ± 0.03 | + | NT    |     |
| 104688 | CG3182  | seizure                             | 0.19 ± 0.02 | 0.21 ± 0.06 | - | 23.06 | *** |
| 104745 | CG8770  | G protein $\beta$ -subunit<br>76C   | 0.07 ± 0.07 | 0.08 ± 0.03 | + | NT    |     |
| 104750 | CG8538  | Aftiphilin                          | 0.10 ± 0.07 | 0.19 ± 0.05 | + | 30.78 | *** |
| 104802 | CG30373 | CG30373                             | 0.15 ± 0.04 | 0.11 ± 0.05 | - | 29.84 | *** |
| 104810 | CG9641  | CG9641                              | 0.03 ± 0.10 | 0.10 ± 0.08 | + | NT    |     |
| 104874 | CG34394 | CG34394                             | 0.07 ± 0.18 | 0.22 ± 0.06 | - | NT    |     |
| 104882 | CG2101  | mitochondrial<br>ribosomal protein  | 0.02 ± 0.02 | 0.10 ± 0.10 | + | NT    |     |

## S35

|        |         |                   |             |              |   |       |     |
|--------|---------|-------------------|-------------|--------------|---|-------|-----|
| 104884 | CG14211 | MAPK Phosphatase  | 0.21 ± 0.06 | 0.20 ± 0.02  | + | 19.87 | *** |
|        |         | 4                 |             |              |   |       |     |
| 104913 | CG14039 | quick-to-court    | 0.24 ± 0.11 | 0.10 ± 0.11  | - | 7.93  |     |
| 104920 | CG13589 | CG13589           | 0.19 ± 0.06 | 0.18 ± 0.07  | + | 21.18 | *** |
| 104922 | CG5093  | Dorsocross3       | 0.03 ± 0.06 | 0.11 ± 0.05  | + | NT    |     |
| 104930 | CG13130 | CG13130           | 0.06 ± 0.06 | 0.15 ± 0.03  | + | NT    |     |
| 104946 | CG4139  | Karl              | 0.14 ± 0.09 | 0.10 ± 0.09  | - | NT    |     |
| 104975 | CG1148  | Osiris 2          | 0.20 ± 0.04 | 0.09 ± 0.09  | - | 24.18 | *** |
| 104988 | CG18659 | CG18659           | 0.04 ± 0.06 | 0.15 ± 0.13  | + | NT    |     |
| 105052 | CG18156 | Mis12             | 0.07 ± 0.11 | 0.10 ± 0.03  | + | NT    |     |
| 105054 | CG10719 | brain tumor       | 0.05 ± 0.10 | 0.13 ± 0.09  | + | NT    |     |
| 105056 | CG42784 | CG42784           | 0.19 ± 0.03 | 0.20 ± 0.03  | + | NT    |     |
| 105064 | CG3318  | Dopamine N        | 0.10 ± 0.15 | 0.20 ± 0.04  | + | 13.78 | *   |
|        |         | acetyltransferase |             |              |   |       |     |
| 105066 | CG4838  | beaten path lc    | 0.10 ± 0.17 | 0.05 ± 0.07  | + | NT    |     |
| 105073 | CG11668 | CG11668           | 0.12 ± 0.10 | 0.20 ± 0.05  | + | NT    |     |
| 105121 | CG3845  | NAT1              | 0.10 ± 0.04 | 0.08 ± 0.04  | - | 20.43 | *** |
| 105132 | CG8486  | Piezo             | 0.22 ± 0.03 | 0.28 ± 0.04  | - | 3.53  |     |
| 105148 | CG1316  | CG1316            | 0.19 ± 0.03 | 0.23 ± 0.11  | - | -1.07 |     |
| 105174 | CG11897 | CG11897           | 0.11 ± 0.01 | 0.10 ± 0.07  | - | NT    |     |
| 105179 | CG10654 | CG10654           | 0.07 ± 0.08 | 0.17 ± 0.07  | + | 21.28 | *** |
| 105201 | CG1130  | scratch           | 0.17 ± 0.05 | -0.06 ± 0.15 | - | 26.28 | *** |
| 105271 | CG13425 | bancal            | 0.21 ± 0.07 | 0.26 ± 0.07  | + | NT    |     |
| 105284 | CG1320  | mitochondrial     | 0.02 ± 0.03 | 0.10 ± 0.09  | - | 24.56 | *** |
|        |         | ribosomal protein |             |              |   |       |     |
|        |         | L23               |             |              |   |       |     |
| 105293 | CG31605 | Basigin           | 0.08 ± 0.11 | 0.25 ± 0.02  | + | NT    |     |

|        |         |                                          |             |              |   |       |     |
|--------|---------|------------------------------------------|-------------|--------------|---|-------|-----|
| 105314 | CG10382 | wrapper                                  | 0.17 ± 0.06 | 0.15 ± 0.07  | - | 27.86 | *** |
| 105362 | CG4158  | worniu                                   | 0.16 ± 0.04 | 0.08 ± 0.10  | + | NT    |     |
| 105371 | CG17437 | will die slowly                          | 0.18 ± 0.07 | 0.21 ± 0.09  | - | NT    |     |
| 105412 | CG42614 | scribbled [???                           | 0.13 ± 0.08 | 0.24 ± 0.07  | + | NT    |     |
| 105421 | CG15651 | CG15651                                  | 0.05 ± 0.05 | 0.02 ± 0.03  | + | 22.21 | *** |
| 105432 | CG17907 | Acetylcholine<br>esterase                | 0.11 ± 0.07 | 0.19 ± 0.09  | - | 22.21 | *** |
| 105477 | CG32000 | CG32000                                  | 0.07 ± 0.13 | 0.20 ± 0.03  | + | NT    |     |
| 105485 | CG2835  | G protein sa 60A                         | 0.00 ± 0.11 | -0.02 ± 0.07 | + | 13.87 | *   |
| 105486 | CG33197 | CG33197                                  | 0.23 ± 0.07 | 0.24 ± 0.07  | - | NT    |     |
| 105489 | CG3262  | CG3262                                   | 0.26 ± 0.08 | 0.26 ± 0.04  | + | 14.00 | **  |
| 105495 | CG7437  | mushroom-body<br>expressed               | 0.14 ± 0.10 | 0.13 ± 0.04  | + | 7.34  |     |
| 105534 | CG9139  | Rabex-5                                  | 0.20 ± 0.08 | 0.14 ± 0.03  | - | 1.43  |     |
| 105536 | CG43374 | Cht6                                     | 0.07 ± 0.09 | 0.02 ± 0.06  | - | NT    |     |
| 105612 | CG12598 | Adenosine<br>deaminase acting<br>on RNA  | 0.01 ± 0.04 | 0.01 ± 0.06  | + | NT    |     |
| 105633 | CG8036  | CG8036                                   | 0.20 ± 0.04 | 0.23 ± 0.09  | + | NT    |     |
| 105662 | CG7494  | mitochondrial<br>ribosomal protein<br>L1 | 0.01 ± 0.01 | 0.00 ± 0.07  | - | NT    |     |
| 105667 | CG1635  | CG1635                                   | 0.14 ± 0.06 | 0.04 ± 0.08  | + | 31.18 | *** |
| 105670 | CG42233 | CG42233                                  | 0.29 ± 0.07 | 0.28 ± 0.07  | - | -2.76 |     |
| 105676 | CG3620  | no receptor<br>potential A               | 0.17 ± 0.05 | 0.13 ± 0.08  | - | 18.50 | *** |
| 105693 | CG5532  | CG5532                                   | 0.21 ± 0.11 | 0.24 ± 0.09  | + | NT    |     |
| 105733 | CG11984 | CG11984                                  | 0.25 ± 0.11 | 0.19 ± 0.09  | - | NT    |     |

|        |         |                                            |              |             |   |       |     |
|--------|---------|--------------------------------------------|--------------|-------------|---|-------|-----|
| 105740 | CG9291  | Elongin C                                  | 0.16 ± 0.08  | 0.28 ± 0.05 | - | 3.65  |     |
| 105754 | CG7535  | GluCl $\alpha$                             | 0.06 ± 0.10  | 0.07 ± 0.03 | - | NT    |     |
| 105803 | CG7370  | CG7370                                     | 0.07 ± 0.05  | 0.15 ± 0.05 | + | NT    |     |
| 105827 | CG5463  | CG5463                                     | -0.05 ± 0.01 | 0.15 ± 0.05 | - | 9.06  |     |
| 105832 | CG4735  | shutdown                                   | 0.15 ± 0.11  | 0.06 ± 0.03 | - | NT    |     |
| 105848 | CG43223 | CG43223                                    | 0.06 ± 0.14  | 0.21 ± 0.08 | + | 32.56 | *** |
| 105852 | CG8815  | Sin3A                                      | 0.06 ± 0.06  | 0.08 ± 0.06 | - | 25.62 | *** |
| 105858 | CG18397 | short spindle 3                            | -0.01 ± 0.06 | 0.17 ± 0.06 | + | 28.25 | *** |
| 105881 | CG9022  | Oligosaccharyltrans<br>ferase 48kD subunit | 0.03 ± 0.04  | 0.07 ± 0.07 | - | 32.56 | *** |
| 105883 | CG1987  | Rbp1-like                                  | 0.10 ± 0.10  | 0.22 ± 0.04 | + | NT    |     |
| 105901 | CG6977  | Cad87A                                     | 0.24 ± 0.02  | 0.11 ± 0.12 | - | 6.68  |     |
| 105905 | CG15704 | CG15704                                    | 0.12 ± 0.07  | 0.23 ± 0.03 | + | 28.40 | *** |
| 105906 | CG14885 | Guanylyl cyclase at<br>89Da                | 0.23 ± 0.02  | 0.26 ± 0.05 | + | NT    |     |
| 105931 | CG13847 | CG13847                                    | 0.19 ± 0.09  | 0.28 ± 0.03 | + | NT    |     |
| 105933 | CG6005  | CG6005                                     | 0.24 ± 0.02  | 0.19 ± 0.04 | + | NT    |     |
| 105944 | CG9945  | CG9945                                     | 0.17 ± 0.03  | 0.14 ± 0.08 | + | NT    |     |
| 105954 | CG5215  | Zinc-finger protein<br>at 72D              | 0.20 ± 0.06  | 0.21 ± 0.05 | - | NT    |     |
| 105978 | CG9854  | hiiragi                                    | 0.17 ± 0.02  | 0.15 ± 0.04 | + | 26.62 | *** |
| 105984 | CG8183  | Kinesin heavy chain<br>73                  | 0.18 ± 0.12  | 0.07 ± 0.07 | + | NT    |     |
| 105987 | CG31729 | CG31729                                    | 0.11 ± 0.05  | 0.07 ± 0.02 | - | 18.62 | *** |
| 106028 | CG32120 | senseless                                  | 0.23 ± 0.10  | 0.23 ± 0.11 | - | 25.34 | *** |
| 106040 | CG4952  | dachshund                                  | 0.14 ± 0.05  | 0.23 ± 0.04 | - | 8.37  |     |
| 106055 | CG4045  | CG4045                                     | 0.16 ± 0.08  | 0.22 ± 0.03 | - | NT    |     |
| 106063 | CG11494 | BTB-protein-VII                            | 0.18 ± 0.06  | 0.05 ± 0.06 | + | 23.18 | *** |

|        |         |                            |              |              |   |       |     |
|--------|---------|----------------------------|--------------|--------------|---|-------|-----|
| 106132 | CG3891  | Nuclear factor Y-<br>box A | 0.06 ± 0.15  | 0.15 ± 0.04  | + | 27.96 | *** |
| 106174 | CG12072 | warts                      | 0.15 ± 0.03  | 0.24 ± 0.13  | - | 10.28 |     |
| 106185 | CG10052 | Retinal Homeobox           | 0.08 ± 0.08  | 0.12 ± 0.06  | - | 23.84 | *** |
| 106192 | CG5794  | CG5794                     | 0.21 ± 0.06  | 0.20 ± 0.08  | - | 31.00 | *** |
| 106213 | CG5690  | Centrobin                  | 0.18 ± 0.10  | 0.22 ± 0.09  | - | NT    |     |
| 106232 | CG7978  | Adenylyl cyclase<br>76E    | 0.12 ± 0.05  | 0.12 ± 0.07  | - | 11.12 |     |
| 106241 | CG1976  | RhoGAP100F                 | 0.08 ± 0.01  | 0.20 ± 0.09  | - | 22.93 | *** |
| 106251 | CG6422  | CG6422                     | 0.20 ± 0.05  | 0.23 ± 0.08  | + | 27.21 | *** |
| 106268 | CG18604 | Salt-inducible<br>kinase 3 | 0.02 ± 0.03  | 0.03 ± 0.04  | - | 21.18 | *** |
| 106270 | CG14998 | ensconsin                  | -0.03 ± 0.14 | 0.18 ± 0.03  | + | 2.40  |     |
| 106282 | CG13272 | CG13272                    | 0.10 ± 0.09  | 0.23 ± 0.11  | - | 2.34  |     |
| 106313 | CG31670 | earmuff                    | 0.15 ± 0.06  | 0.15 ± 0.06  | + | NT    |     |
| 106319 | CG18347 | CG18347                    | 0.02 ± 0.04  | 0.23 ± 0.05  | + | NT    |     |
| 106326 | CG31005 | qlless                     | 0.04 ± 0.04  | 0.17 ± 0.07  | + | 30.40 | *** |
| 106331 | CG15771 | CG15771                    | 0.20 ± 0.06  | 0.23 ± 0.01  | + | 6.95  |     |
| 106337 | CG14184 | CG14184                    | 0.14 ± 0.01  | 0.05 ± 0.09  | + | NT    |     |
| 106338 | CG43225 | axotactin                  | 0.22 ± 0.03  | 0.20 ± 0.05  | - | 14.25 | **  |
| 106344 | CG7843  | CG7843                     | 0.07 ± 0.03  | 0.06 ± 0.02  | - | 20.06 | *** |
| 106348 | CG5674  | CG5674                     | 0.14 ± 0.10  | 0.16 ± 0.06  | + | NT    |     |
| 106358 | CG34374 | Rapgap1                    | 0.25 ± 0.04  | 0.20 ± 0.07  | - | 20.59 | *** |
| 106382 | CG6187  | RluA-2                     | 0.21 ± 0.13  | 0.27 ± 0.12  | - | -7.82 |     |
| 106390 | CG42396 | wech                       | 0.20 ± 0.03  | 0.25 ± 0.05  | + | NT    |     |
| 106405 | CG31352 | CG31352                    | 0.09 ± 0.00  | 0.14 ± 0.13  | - | 13.31 | *   |
| 106433 | CG9343  | Trithorax-like             | 0.13 ± 0.03  | 0.03 ± 0.03  | + | 39.28 | *** |
| 106475 | CG7903  | CG7903                     | 0.08 ± 0.06  | -0.04 ± 0.02 | + | 21.40 | *** |

|        |         |                                  |              |              |   |        |     |
|--------|---------|----------------------------------|--------------|--------------|---|--------|-----|
| 106483 | CG13760 | CG13760                          | 0.12 ± 0.11  | 0.16 ± 0.07  | + | NT     |     |
| 106484 | CG15112 | enabled                          | 0.19 ± 0.02  | 0.10 ± 0.03  | - | -0.82  |     |
| 106492 | CG7959  | Big brother                      | 0.17 ± 0.05  | 0.11 ± 0.07  | - | 11.21  |     |
| 106500 | CG5938  | CG5938                           | 0.23 ± 0.11  | 0.11 ± 0.07  | + | 22.81  | *** |
| 106534 | CG32532 | CG32532                          | 0.15 ± 0.05  | 0.11 ± 0.028 | + | 27.03  | *** |
| 106629 | CG4882  | CG4882                           | -0.05 ± 0.12 | 0.03 ± 0.06  | - | 27.43  | *** |
| 106632 | CG6948  | Clathrin light chain             | -0.01 ± 0.14 | 0.06 ± 0.08  | - | 25.56  | *** |
| 106644 | CG10002 | fork head                        | 0.02 ± 0.01  | 0.18 ± 0.03  | + | NT     |     |
| 106652 | CG31522 | CG31522                          | 0.25 ± 0.1   | 0.25 ± 0.12  | - | NT     |     |
| 106687 | CG6181  | CG6181                           | 0.17 ± 0.1   | 0.25 ± 0.1   | - | 7.53   |     |
| 106698 | CG13384 | CG13384                          | 0.04 ± 0.02  | 0.12 ± 0.12  | - | 11.81  |     |
| 106784 | CG10366 | CG10366                          | 0.04 ± 0.13  | 0.08 ± 0.07  | + | NT     |     |
| 106785 | CG4334  | CG4334                           | 0.25 ± 0.19  | 0.28 ± 0.10  | - | NT     |     |
| 106793 | CG2859  | TBP-associated<br>factor 10      | 0.24 ± 0.11  | 0.28 ± 0.11  | - | -13.91 | *   |
| 106812 | CG16858 | viking                           | 0.08 ± 0.06  | 0.05 ± 0.13  | + | NT     |     |
| 106820 | CG15356 | CG15356                          | 0.14 ± 0.11  | 0.24 ± 0.07  | + | NT     |     |
| 106827 | CG3717  | bcn92                            | 0.11 ± 0.07  | 0.18 ± 0.09  | + | NT     |     |
| 106842 | CG9245  | Phosphatidylinositol<br>synthase | 0.02 ± 0.07  | 0.01 ± 0.04  | + | 22.43  | *** |
| 106890 | CG14483 | CG14483                          | 0.02 ± 0.05  | 0.19 ± 0.05  | - | NT     |     |
| 106899 | CG15237 | CG15237                          | -0.05 ± 0.05 | 0.01 ± 0.02  | + | 19.71  | *** |
| 106918 | CG2685  | CG2685                           | 0.03 ± 0.15  | 0.14 ± 0.10  | - | 26.65  | *** |
| 106919 | CG7693  | frayed                           | 0.09 ± 0.05  | 0.05 ± 0.03  | - | 19.62  | *** |
| 106928 | CG7177  | CG7177                           | 0.03 ± 0.03  | 0.03 ± 0.06  | + | 36.68  | *** |
| 106931 | CG17221 | CG17221                          | 0.21 ± 0.12  | 0.23 ± 0.08  | + | NT     |     |
| 106961 | CG8380  | Dopamine<br>transporter          | 0.11 ± 0.18  | 0.12 ± 0.05  | - | 8.25   |     |



|        |         |                                           |             |             |   |       |     |
|--------|---------|-------------------------------------------|-------------|-------------|---|-------|-----|
| 106984 | CG30122 | CG30122                                   | 0.22 ± 0.10 | 0.20 ± 0.12 | - | 2.84  |     |
| 106987 | CG13609 | CG13609                                   | 0.04 ± 0.07 | 0.22 ± 0.04 | - | NT    |     |
| 107014 | CG4109  | Syntaxin 8                                | 0.18 ± 0.08 | 0.27 ± 0.05 | - | 7.90  |     |
| 107018 | CG2811  | CG2811                                    | 0.18 ± 0.11 | 0.15 ± 0.16 | + | 12.40 |     |
| 107026 | CG31739 | CG31739                                   | 0.01 ± 0.07 | 0.05 ± 0.04 | - | 30.15 | *** |
| 107039 | CG13759 | CG13759                                   | 0.11 ± 0.01 | 0.17 ± 0.11 | - | 27.96 | *** |
| 107058 | CG9652  | Dopamine receptor                         | 0.14 ± 0.07 | 0.08 ± 0.04 | - | -7.94 |     |
| 107064 | CG3727  | dreadlocks                                | 0.26 ± 0.07 | 0.13 ± 0.05 | - | 26.68 | *** |
| 107174 | CG31706 | CG31706                                   | 0.22 ± 0.03 | 0.11 ± 0.08 | - | NT    |     |
| 107204 | CG8103  | CG8103                                    | 0.20 ± 0.04 | 0.24 ± 0.08 | - | NT    |     |
| 107251 | CG10949 | CG10949                                   | 0.17 ± 0.04 | 0.24 ± 0.07 | + | 20.84 | *** |
| 107307 | CG34126 | CG34126                                   | 0.21 ± 0.06 | 0.17 ± 0.09 | - | NT    |     |
| 107308 | CG17642 | mitochondrial<br>ribosomal protein<br>L48 | 0.02 ± 0.06 | 0.13 ± 0.05 | - | 23.09 | *** |
| 107322 | CG5864  | AP-1σ                                     | 0.09 ± 0.09 | 0.22 ± 0.08 | + | 25.65 | *** |
| 107335 | CG10076 | spire                                     | 0.21 ± 0.15 | 0.26 ± 0.06 | - | 4.59  |     |
| 107343 | CG11049 | shaven                                    | 0.20 ± 0.13 | 0.23 ± 0.00 | - | 4.87  |     |
| 107344 | CG11579 | armadillo                                 | 0.14 ± 0.05 | 0.09 ± 0.02 | + | 35.28 | *** |
| 107351 | CG11120 | CG11120                                   | 0.25 ± 0.06 | 0.11 ± 0.02 | - | NT    |     |
| 107369 | CG18768 | Ankyrin 2                                 | 0.22 ± 0.10 | 0.26 ± 0.03 | - | 25.75 | *** |
| 107390 | CG4141  | Pi3K92E                                   | 0.21 ± 0.05 | 0.23 ± 0.16 | - | NT    |     |
| 107408 | CG5273  | CG5273                                    | 0.02 ± 0.01 | 0.12 ± 0.08 | + | 27.12 | *** |
| 107418 | CG18445 | oysgedart                                 | 0.17 ± 0.04 | 0.23 ± 0.02 | - | 2.40  |     |
| 107473 | CG33556 | formin 3                                  | 0.22 ± 0.08 | 0.20 ± 0.07 | - | NT    |     |
| 107537 | CG34123 | CG34123                                   | 0.13 ± 0.02 | 0.16 ± 0.07 | + | NT    |     |
| 107539 | CG32709 | CG32709                                   | 0.15 ± 0.12 | 0.12 ± 0.03 | + | NT    |     |
| 107572 | CG3157  | γ-Tubulin at 23C                          | 0.11 ± 0.17 | 0.10 ± 0.06 | + | NT    |     |

|        |         |                                                   |             |             |   |       |     |
|--------|---------|---------------------------------------------------|-------------|-------------|---|-------|-----|
| 107574 | CG8128  | CG8128                                            | 0.21 ± 0.15 | 0.19 ± 0.09 | + | NT    |     |
| 107597 | CG31092 | Lipophorin receptor<br>2                          | 0.23 ± 0.04 | 0.08 ± 0.00 | + | 27.15 | *** |
| 107600 | CG1902  | CG1902                                            | 0.22 ± 0.10 | 0.20 ± 0.18 | - | 4.59  |     |
| 107642 | CG3861  | knockdown                                         | 0.20 ± 0.10 | 0.07 ± 0.02 | + | NT    |     |
| 107656 | CG4726  | Major Facilitator<br>Superfamily<br>Transporter 3 | 0.16 ± 0.05 | 0.22 ± 0.06 | + | 10.40 |     |
| 107658 | CG7029  | CG7029                                            | 0.24 ± 0.05 | 0.03 ± 0.05 | - | NT    |     |
| 107663 | CG1147  | neuropeptide F<br>receptor                        | 0.09 ± 0.17 | 0.06 ± 0.08 | - | 21.81 | *** |
| 107715 | CG4078  | N/A                                               | 0.14 ± 0.07 | 0.01 ± 0.10 | + | NT    |     |
| 107716 | CG1945  | fat facets                                        | 0.15 ± 0.07 | 0.24 ± 0.01 | - | NT    |     |
| 107745 | CG3204  | Ras-associated<br>protein 2-like                  | 0.23 ± 0.07 | 0.19 ± 0.06 | - | 12.12 | *** |
| 107767 | CG7663  | Cuticular protein<br>78Cb                         | 0.15 ± 0.05 | 0.03 ± 0.03 | - | NT    |     |
| 107800 | CG7224  | CG7224                                            | 0.11 ± 0.08 | 0.14 ± 0.03 | + | NT    |     |
| 107811 | CG9776  | CG9776                                            | 0.13 ± 0.04 | 0.23 ± 0.02 | + | NT    |     |
| 107833 | CG7675  | CG7675                                            | 0.16 ± 0.19 | 0.19 ± 0.10 | - | 0.87  |     |
| 107867 | CG10147 | CG10147                                           | 0.16 ± 0.04 | 0.21 ± 0.03 | - | 3.84  |     |
| 107875 | CG14511 | CG14511                                           | 0.21 ± 0.04 | 0.20 ± 0.04 | + | 8.62  |     |
| 107883 | CG11280 | tartan                                            | 0.14 ± 0.06 | 0.10 ± 0.05 | - | 12.09 |     |
| 107885 | CG15639 | CG15639                                           | 0.22 ± 0.08 | 0.20 ± 0.03 | + | 31.87 | *** |
| 107926 | CG9896  | CG9896                                            | 0.16 ± 0.17 | 0.26 ± 0.03 | + | 12.12 |     |
| 107939 | CG17742 | CG17742                                           | 0.23 ± 0.07 | 0.20 ± 0.06 | + | NT    |     |
| 107945 | CG7166  | CG7166                                            | 0.17 ± 0.12 | 0.26 ± 0.05 | - | 10.65 |     |
| 107967 | CG32498 | dunce                                             | 0.00 ± 0.09 | 0.11 ± 0.06 | - | 13.00 |     |

|        |         |                                           |              |              |   |        |     |
|--------|---------|-------------------------------------------|--------------|--------------|---|--------|-----|
| 107981 | CG1308  | CG1308                                    | 0.22 ± 0.09  | 0.24 ± 0.03  | - | 16.00  | *** |
| 107987 | CG1659  | unc-119                                   | 0.25 ± 0.09  | 0.23 ± 0.06  | - | 10.93  |     |
| 107992 | CG7154  | CG7154                                    | 0.15 ± 0.08  | 0.12 ± 0.07  | + | 21.62  | *** |
| 108026 | CG8730  | drosha                                    | 0.20 ± 0.06  | 0.11 ± 0.06  | - | NT     |     |
| 108067 | CG5186  | scruin like at the<br>midline             | 0.17 ± 0.08  | 0.26 ± 0.05  | + | NT     |     |
| 108069 | CG6218  | CG6218                                    | 0.21 ± 0.12  | 0.19 ± 0.08  | - | -11.32 |     |
| 108078 | CG32103 | CG32103                                   | 0.22 ± 0.06  | 0.19 ± 0.02  | + | NT     |     |
| 108084 | CG6605  | Bicaudal D                                | 0.06 ± 0.10  | 0.07 ± 0.05  | + | NT     |     |
| 108086 | CG6525  | protein partner of<br>snf                 | 0.19 ± 0.08  | 0.12 ± 0.07  | - | NT     |     |
| 108108 | CG17994 | CG17994                                   | 0.20 ± 0.07  | 0.10 ± 0.11  | - | NT     |     |
| 108128 | CG6827  | Neurexin IV                               | 0.16 ± 0.05  | 0.22 ± 0.06  | + | NT     |     |
| 108132 | CG5237  | CG5237                                    | 0.25 ± 0.12  | 0.17 ± 0.10  | - | 16.40  | *** |
| 108150 | CG4587  | CG4587                                    | 0.15 ± 0.05  | 0.23 ± 0.04  | + | NT     |     |
| 108177 | CG8524  | NK7.1                                     | 0.15 ± 0.08  | 0.14 ± 0.18  | - | NT     |     |
| 108180 | CG42788 | CG42788                                   | 0.24 ± 0.08  | 0.08 ± 0.04  | - | NT     |     |
| 108193 | CG10360 | refractory to sigma<br>P                  | 0.19 ± 0.14  | 0.21 ± 0.09  | - | 3.37   |     |
| 108196 | CG10226 | CG10226                                   | 0.01 ± 0.10  | 0.17 ± 0.04  | + | NT     |     |
| 108197 | CG6739  | CG6739                                    | 0.19 ± 0.03  | 0.23 ± 0.17  | - | -0.41  |     |
| 108235 | CG30203 | CG30203                                   | 0.12 ± 0.09  | 0.21 ± 0.09  | + | 7.50   |     |
| 108246 | CG8009  | CG8009                                    | 0.13 ± 0.13  | 0.05 ± 0.08  | - | NT     |     |
| 108249 | CG12254 | Mediator complex<br>subunit 25            | 0.19 ± 0.03  | 0.20 ± 0.07  | + | 23.21  | *** |
| 108259 | CG10603 | mitochondrial<br>ribosomal protein<br>L13 | -0.03 ± 0.04 | -0.05 ± 0.04 | - | 12.86  |     |

|        |         |                                                    |             |             |   |       |     |
|--------|---------|----------------------------------------------------|-------------|-------------|---|-------|-----|
| 108287 | CG32211 | TBP-associated<br>factor 6                         | 0.19 ± 0.04 | 0.12 ± 0.02 | + | NT    |     |
| 108294 | CG6718  | calcium-<br>independent<br>phospholipase A2<br>VIA | 0.17 ± 0.04 | 0.11 ± 0.04 | - | 20.78 | *** |
| 108295 | CG9134  | CG9134                                             | 0.22 ± 0.05 | 0.24 ± 0.05 | - | NT    |     |
| 108312 | CG7727  | β amyloid protein<br>precursor-like                | 0.13 ± 0.06 | 0.18 ± 0.03 | - | 14.75 | **  |
| 108323 | CG32250 | CG32250                                            | 0.15 ± 0.07 | 0.06 ± 0.07 | + | 27.59 | *** |
| 108332 | CG3363  | CG3363                                             | 0.19 ± 0.10 | 0.21 ± 0.18 | + | NT    |     |
| 108346 | CG5316  | CG5316                                             | 0.24 ± 0.08 | 0.13 ± 0.04 | - | -0.69 |     |
| 108351 | CG9218  | smooth                                             | 0.12 ± 0.06 | 0.13 ± 0.05 | - | 24.40 | *** |
| 108358 | CG6578  | phantom                                            | 0.06 ± 0.06 | 0.23 ± 0.07 | + | NT    |     |
| 108361 | CG1152  | Glucose<br>dehydrogenase                           | 0.12 ± 0.11 | 0.12 ± 0.04 | + | NT    |     |
| 108371 | CG42588 | CG42588                                            | 0.13 ± 0.1  | 0.14 ± 0.04 | + | NT    |     |
| 108373 | CG9613  | Coenzyme Q<br>biosynthesis protein<br>2            | 0.13 ± 0.03 | 0.14 ± 0.06 | - | NT    |     |
| 108375 | CG6120  | Tetraspanin 96F                                    | 0.24 ± 0.15 | 0.25 ± 0.05 | + | 23.00 | *** |
| 108377 | CG9688  | mitochondrial<br>ribosomal protein<br>S18C         | 0.03 ± 0.02 | 0.02 ± 0.07 | - | 8.03  |     |
| 108395 | CG4574  | Phospholipase C at<br>21C                          | 0.16 ± 0.04 | 0.13 ± 0.04 | + | NT    |     |
| 108401 | CG3738  | Cyclin-dependent<br>kinase subunit 30A             | 0.09 ± 0.03 | 0.28 ± 0.02 | + | 18.96 | *** |

|        |         |                                            |              |             |   |       |     |
|--------|---------|--------------------------------------------|--------------|-------------|---|-------|-----|
| 108406 | CG30498 | boca                                       | 0.13 ± 0.07  | 0.08 ± 0.10 | + | 37.06 | *** |
| 108409 | CG1072  | Arrowhead                                  | 0.22 ± 0.09  | 0.23 ± 0.03 | + | 17.75 | *** |
| 108414 | CG4758  | Translocation<br>protein 1                 | 0.22 ± 0.14  | 0.13 ± 0.08 | - | 1.40  |     |
| 108433 | CG6713  | Nitric oxide<br>synthase                   | 0.24 ± 0.04  | 0.18 ± 0.10 | + | NT    |     |
| 108444 | CG8155  | CG8155                                     | -0.07 ± 0.05 | 0.03 ± 0.07 | + | 13.40 | *   |
| 108450 | CG32743 | no-on-and-no-off<br>transient C            | 0.24 ± 0.06  | 0.14 ± 0.05 | + | 13.43 | *** |
| 108455 | CG4316  | Stubble                                    | 0.24 ± 0.01  | 0.14 ± 0.10 | - | NT    |     |
| 108481 | CG42260 | CG42260                                    | 0.16 ± 0.11  | 0.14 ± 0.04 | + | NT    |     |
| 108483 | CG9065  | CG9065                                     | 0.13 ± 0.07  | 0.12 ± 0.06 | - | 6.96  |     |
| 108494 | CG16779 | CG16779                                    | 0.25 ± 0.10  | 0.25 ± 0.08 | + | 9.40  |     |
| 108508 | CG12467 | CG12467                                    | 0.25 ± 0.05  | 0.25 ± 0.11 | + | NT    |     |
| 108560 | CG5884  | par-6                                      | -0.01 ± 0.05 | 0.05 ± 0.03 | - | 8.43  |     |
| 108586 | CG5688  | Grip163                                    | 0.23 ± 0.04  | 0.20 ± 0.06 | - | NT    |     |
| 108598 | CG4082  | Minichromosome<br>maintenance 5            | 0.20 ± 0.13  | 0.17 ± 0.10 | - | NT    |     |
| 108604 | CG15629 | CG15629                                    | 0.15 ± 0.03  | 0.15 ± 0.09 | + | -4.66 |     |
| 108607 | CG4036  | CG4036                                     | 0.20 ± 0.06  | 0.23 ± 0.05 | + | NT    |     |
| 108608 | CG10023 | Focal Adhesion<br>Kinase                   | 0.26 ± 0.04  | 0.31 ± 0.09 | - | 19.65 | *** |
| 108650 | CG6095  | CG6095                                     | 0.21 ± 0.03  | 0.15 ± 0.03 | + | NT    |     |
| 108729 | CG1963  | pterin-4a-<br>carbinolamine<br>dehydratase | 0.11 ± 0.05  | 0.19 ± 0.08 | - | 28.40 | *** |
| 108753 | CG33639 | CG33639                                    | 0.11 ± 0.03  | 0.16 ± 0.07 | + | NT    |     |
| 108797 | CG7145  | delta-1-Pyrroline-5-                       | 0.15 ± 0.09  | 0.11 ± 0.04 | - | NT    |     |

| carboxylate          |         |                    |             |              |   |       |     |
|----------------------|---------|--------------------|-------------|--------------|---|-------|-----|
| dehydrogenase 1      |         |                    |             |              |   |       |     |
| 108839               | CG5380  | CG5380             | 0.13 ± 0.05 | 0.04 ± 0.09  | - | NT    |     |
| 108876               | CG4931  | specifically Rac1- | 0.19 ± 0.05 | 0.21 ± 0.03  | - | NT    |     |
| associated protein 1 |         |                    |             |              |   |       |     |
| 108879               | CG10118 | pale               | 0.04 ± 0.07 | -0.09 ± 0.10 | - | NT    |     |
| 108903               | CG2277  | CG2277             | 0.15 ± 0.08 | 0.19 ± 0.08  | - | NT    |     |
| 108907               | CG7250  | Toll-6             | 0.25 ± 0.02 | 0.17 ± 0.06  | - | NT    |     |
| 108929               | CG8632  | CG8632             | 0.10 ± 0.10 | 0.06 ± 0.05  | + | 24.59 | *** |
| 108959               | CG14721 | CG14721            | 0.09 ± 0.02 | 0.20 ± 0.03  | - | 24.68 | *** |
| 108993               | CG8597  | lark               | 0.15 ± 0.07 | 0.26 ± 0.09  | - | 10.15 |     |
| 108997               | CG12954 | mitochondrial      | 0.06 ± 0.06 | 0.10 ± 0.05  | - | 8.18  |     |
| ribosomal protein    |         |                    |             |              |   |       |     |
| L41                  |         |                    |             |              |   |       |     |
| 109084               | CG6998  | cut up             | 0.11 ± 0.05 | 0.08 ± 0.09  | - | -1.72 |     |
| 109111               | CG11100 | Mesoderm-          | 0.20 ± 0.16 | 0.14 ± 0.06  | + | 30.71 | *** |
| expressed 2          |         |                    |             |              |   |       |     |
| 109193               | CGnone  | CGnone             | 0.25 ± 0.03 | 0.22 ± 0.04  | + | 11.14 | *** |
| 109243               | CG18773 | Lcp65Ab2           | 0.20 ± 0.08 | 0.09 ± 0.08  | + | NT    |     |
| 109334               | CG18661 | CG18661            | 0.21 ± 0.09 | 0.21 ± 0.11  | + | 5.59  |     |
| 109410               | CG5729  | Dgp-1              | 0.18 ± 0.03 | 0.22 ± 0.11  | - | 11.62 |     |
| 109413               | CG15609 | Eps15 homology     | 0.21 ± 0.04 | 0.07 ± 0.06  | - | 13.12 |     |
| domain containing    |         |                    |             |              |   |       |     |
| protein-binding      |         |                    |             |              |   |       |     |
| protein 1            |         |                    |             |              |   |       |     |
| 109436               | CG2910  | spenito            | 0.19 ± 0.03 | 0.18 ± 0.04  | - | 28.78 | *** |
| 109443               | CG7168  | CG7168             | 0.06 ± 0.06 | 0.05 ± 0.03  | + | 21.90 | *** |
| 109479               | CG30015 | CG30015            | 0.15 ± 0.04 | 0.20 ± 0.03  | + | 18.37 | *** |

|        |         |                                               |              |              |   |       |     |
|--------|---------|-----------------------------------------------|--------------|--------------|---|-------|-----|
| 109506 | CG17065 | CG17065                                       | 0.15 ± 0.09  | 0.17 ± 0.06  | + | 25.59 | *** |
| 109516 | CG34402 | CG34402                                       | 0.25 ± 0.18  | 0.04 ± 0.17  | - | -0.79 |     |
| 109594 | CG8177  | CG8177                                        | 0.14 ± 0.05  | 0.22 ± 0.09  | + | 19.34 | *** |
| 109606 | CG17336 | Ligand-gated<br>chloride channel<br>homolog 3 | 0.14 ± 0.08  | 0.19 ± 0.04  | + | 26.03 | *** |
| 109613 | CG13927 | gamma-glutamyl<br>carboxylase                 | 0.24 ± 0.09  | 0.15 ± 0.18  | - | -1.16 |     |
| 109622 | CG14411 | CG14411                                       | 0.11 ± 0.02  | 0.12 ± 0.04  | - | 14.62 | **  |
| 109629 | CG6512  | CG6512                                        | 0.07 ± 0.02  | 0.03 ± 0.06  | + | NT    |     |
| 109637 | CG8318  | Neurofibromin 1                               | -0.01 ± 0.08 | 0.07 ± 0.09  | - | 22.21 | *** |
| 109654 | CG32672 | Autophagy-specific<br>gene 8a                 | 0.12 ± 0.03  | 0.02 ± 0.10  | + | 24.06 | *** |
| 109659 | CG4913  | ENL/AF9-related                               | 0.22 ± 0.06  | 0.27 ± 0.06  | - | -2.63 |     |
| 109662 | CG5904  | mitochondrial<br>ribosomal protein<br>S31     | 0.00 ± 0.05  | 0.03 ± 0.04  | - | 28.28 | *** |
| 109673 | CG30426 | eggless                                       | 0.12 ± 0.07  | 0.12 ± 0.06  | + | NT    |     |
| 109699 | CG18676 | tipE homolog 3                                | 0.20 ± 0.04  | 0.05 ± 0.05  | + | NT    |     |
| 109732 | CG13475 | HGTX                                          | 0.25 ± 0.05  | 0.17 ± 0.02  | - | 19.00 | *** |
| 109739 | CG43065 | bruno-2                                       | 0.25 ± 0.13  | 0.00 ± 0.32  | - | -3.69 |     |
| 109742 | CG17023 | Dead box protein 80                           | 0.23 ± 0.07  | 0.11 ± 0.12  | - | 10.40 |     |
| 109767 | CG10732 | CG10732                                       | 0.11 ± 0.10  | 0.24 ± 0.06  | + | 22.15 | *** |
| 109768 | CG31451 | CG31451                                       | 0.15 ± 0.04  | 0.2 ± 0.1    | - | -0.16 |     |
| 109770 | CG7781  | CG7781                                        | 0.22 ± 0.17  | 0.21 ± 0.06  | - | -0.82 |     |
| 109793 | CG4314  | scarlet                                       | 0.16 ± 0.11  | 0.26 ± 0.10  | - | NT    |     |
| 109806 | CG13287 | CG13287                                       | 0.20 ± 0.07  | -0.03 ± 0.18 | - | 16.43 | *** |
| 109819 | CG3279  | CG3279                                        | 0.22 ± 0.06  | 0.18 ± 0.08  | - | NT    |     |

|        |         |                                        |             |              |   |       |     |
|--------|---------|----------------------------------------|-------------|--------------|---|-------|-----|
| 109822 | CG5104  | CG5104                                 | 0.11 ± 0.11 | -0.06 ± 0.2  | + | NT    |     |
| 109828 | CG8301  | CG8301                                 | 0.14 ± 0.04 | 0.17 ± 0.07  | + | NT    |     |
| 109849 | CG42599 | PFTAIRE-                               | 0.17 ± 0.05 | 0.25 ± 0.06  | + | 8.65  |     |
|        |         | interacting factor 1A                  |             |              |   |       |     |
| 109858 | CG9819  | Calcineurin A at<br>14F                | 0.15 ± 0.01 | -0.01 ± 0.01 | + | 22.75 | *** |
| 109871 | CG12581 | CG12581                                | 0.07 ± 0.03 | 0.19 ± 0.01  | + | NT    |     |
| 109880 | CG18582 | mushroom bodies<br>tiny                | 0.23 ± 0.04 | 0.13 ± 0.08  | + | NT    |     |
| 109881 | CG10697 | Dopa<br>decarboxylase                  | 0.06 ± 0.06 | 0.13 ± 0.04  | - | 37.15 | *** |
| 109882 | CG32226 | Peroxin 23                             | 0.24 ± 0.14 | 0.25 ± 0.09  | + | NT    |     |
| 109949 | CG8433  | Ext2                                   | 0.09 ± 0.04 | 0.15 ± 0.08  | + | NT    |     |
| 109974 | Cgnone  | N/A                                    | 0.20 ± 0.04 | 0.15 ± 0.07  | + | 25.00 | *** |
| 109975 | CG32425 | CG32425                                | 0.04 ± 0.09 | 0.18 ± 0.06  | - | NT    |     |
| 109993 | Cgnone  | N/A                                    | 0.16 ± 0.05 | 0.06 ± 0.06  | + | NT    |     |
| 110014 | CG4099  | Scavenger receptor<br>class C, type I  | 0.12 ± 0.17 | 0.04 ± 0.07  | + | NT    |     |
| 110051 | CG30329 | Vacuolar H+<br>ATPase subunit<br>100-3 | 0.18 ± 0.03 | 0.1 ± 0.08   | + | NT    |     |
| 110053 | CG14110 | CG14110                                | 0.20 ± 0.09 | -0.01 ± 0.06 | + | 18.53 | *** |
| 110058 | CG16700 | CG16700                                | 0.09 ± 0.04 | 0.08 ± 0.03  | + | NT    |     |
| 110059 | CG13140 | dpr19                                  | 0.16 ± 0.12 | 0.11 ± 0.06  | + | NT    |     |
| 110075 | CG13965 | CG13965                                | 0.09 ± 0.05 | 0.22 ± 0.06  | - | NT    |     |
| 110076 | CG17161 | grapes                                 | 0.08 ± 0.02 | 0.27 ± 0.01  | + | NT    |     |
| 110077 | CG3427  | Epac                                   | 0.17 ± 0.05 | 0.19 ± 0.06  | + | 13.06 |     |
| 110175 | CG3069  | TBP-associated                         | 0.21 ± 0.04 | 0.13 ± 0.05  | + | NT    |     |



| factor 10b        |         |                       |             |              |   |       |     |
|-------------------|---------|-----------------------|-------------|--------------|---|-------|-----|
| 110178            | CG1271  | CG1271                | 0.08 ± 0.12 | 0.20 ± 0.04  | + | NT    |     |
| 110184            | CG7766  | CG7766                | 0.22 ± 0.03 | 0.25 ± 0.09  | - | NT    |     |
| 110193            | CG43227 | milton                | 0.23 ± 0.05 | 0.06 ± 0.01  | + | NT    |     |
| 110196            | CG10585 | CG10585               | 0.18 ± 0.06 | 0.19 ± 0.08  | - | NT    |     |
| 110204            | CG3938  | Cyclin E              | 0.24 ± 0.05 | 0.25 ± 0.09  | + | 13.28 | *   |
| 110212            | CG8288  | mitochondrial         | 0.11 ± 0.07 | 0.02 ± 0.05  | - | 16.00 | *** |
| ribosomal protein |         |                       |             |              |   |       |     |
| L3                |         |                       |             |              |   |       |     |
| 110213            | CG32555 | RhoGAPp190            | 0.18 ± 0.04 | 0.19 ± 0.10  | - | NT    |     |
| 110228            | CG4720  | Protein kinase at     | 0.09 ± 0.02 | 0.29 ± 0.01  | + | 17.06 | *** |
| 92B               |         |                       |             |              |   |       |     |
| 110235            | CG7940  | Actin-related protein | 0.21 ± 0.23 | 0.06 ± 0.10  | - | 17.28 | *** |
| 5                 |         |                       |             |              |   |       |     |
| 110240            | CG6607  | CG6607                | 0.15 ± 0.05 | 0.21 ± 0.14  | - | 12.21 |     |
| 110246            | CG6327  | CG6327                | 0.25 ± 0.12 | 0.26 ± 0.15  | - | 1.68  |     |
| 110252            | CG31371 | CG31371               | 0.06 ± 0.07 | 0.13 ± 0.07  | + | 33.21 | *** |
| 110265            | CG10440 | CG10440               | 0.24 ± 0.06 | 0.27 ± 0.05  | - | 22.53 | *** |
| 110274            | CG8585  | lh channel            | 0.12 ± 0.15 | -0.06 ± 0.09 | + | 31.62 | *** |
| 110290            | CG1451  | APC-like              | 0.11 ± 0.05 | 0.25 ± 0.06  | + | 21.43 | *** |
| 110345            | CG7015  | Upstream of N-ras     | 0.20 ± 0.11 | 0.06 ± 0.06  | - | 13.12 |     |
| 110346            | CG4030  | CG4030                | 0.06 ± 0.09 | 0.16 ± 0.07  | + | NT    |     |
| 110415            | CG4832  | centrosomin           | 0.20 ± 0.09 | 0.09 ± 0.17  | + | NT    |     |
| 110432            | CG6863  | Tolkin                | 0.20 ± 0.05 | 0.15 ± 0.04  | + | 31.37 | *** |
| 110456            | CG4495  | CG4495                | 0.25 ± 0.1  | 0.26 ± 0.08  | - | 5.37  |     |
| 110494            | CG33950 | terribly reduced      | 0.18 ± 0.04 | 0.19 ± 0.14  | - | NT    |     |
| optic lobes       |         |                       |             |              |   |       |     |
| 110495            | CG32244 | Neurotrophin 1        | 0.25 ± 0.02 | 0.09 ± 0.07  | - | 10.87 |     |

|        |         |                                   |              |              |   |       |     |
|--------|---------|-----------------------------------|--------------|--------------|---|-------|-----|
| 110512 | CG3630  | CG3630                            | 0.11 ± 0.09  | 0.12 ± 0.07  | + | NT    |     |
| 110518 | CG32062 | Ataxin-2 binding<br>protein 1     | -0.01 ± 0.03 | 0.10 ± 0.04  | + | 34.81 | *** |
| 110552 | CG2204  | G protein $\alpha$ 47A            | 0.04 ± 0.16  | 0.16 ± 0.12  | + | 19.69 | *** |
| 110578 | CG4611  | CG4611                            | 0.07 ± 0.10  | 0.28 ± 0.07  | + | NT    |     |
| 110594 | CG2819  | PvuII-PstI homology<br>13         | 0.18 ± 0.11  | 0.19 ± 0.01  | - | NT    |     |
| 110606 | CG3985  | Synapsin                          | 0.19 ± 0.06  | 0.09 ± 0.05  | + | NT    |     |
| 110616 | CG3016  | CG3016                            | 0.16 ± 0.04  | 0.05 ± 0.14  | - | NT    |     |
| 110636 | CG34401 | CG34401                           | 0.21 ± 0.07  | 0.20 ± 0.06  | - | 20.40 | *** |
| 110663 | CG17370 | Signal peptide<br>peptidase-like  | 0.18 ± 0.02  | 0.12 ± 0.05  | + | NT    |     |
| 110664 | CG6582  | Aac11                             | 0.21 ± 0.04  | 0.17 ± 0.06  | + | 29.93 | *** |
| 110665 | CG4679  | CG4679                            | -0.05 ± 0.08 | -0.01 ± 0.02 | - | 13.84 | *   |
| 110686 | CG42555 | tweek                             | 0.19 ± 0.06  | 0.12 ± 0.05  | + | NT    |     |
| 110692 | CG6428  | CG6428                            | 0.14 ± 0.15  | 0.24 ± 0.05  | - | 2.43  |     |
| 110696 | CG5300  | Klp31E                            | 0.19 ± 0.01  | 0.18 ± 0.12  | + | 29.56 | *** |
| 110708 | CG8422  | Diuretic hormone 44<br>receptor 1 | 0.07 ± 0.21  | 0.1 ± 0.06   | - | -5.01 |     |
| 110717 | CG10392 | super sex combs                   | 0.04 ± 0.06  | 0.07 ± 0.01  | - | 15.68 | *** |
| 110737 | CG12125 | CG12125                           | 0.24 ± 0.09  | 0.12 ± 0.02  | + | NT    |     |
| 110774 | CG15218 | Cyclin K                          | 0.18 ± 0.09  | 0.13 ± 0.05  | + | NT    |     |
| 110786 | CG3530  | CG3530                            | 0.24 ± 0.05  | 0.14 ± 0.02  | + | 7.37  |     |
| 110805 | CG7020  | DISCO Interacting<br>Protein 2    | 0.10 ± 0.08  | 0.28 ± 0.06  | - | NT    |     |
